# Supplementary material for: Exploring zinc oxide morphologies for aqueous solar cells by a photoelectrochemical, computational, and multivariate approach
Source: Royal Society of Chemistry journal article supplement (doi:10.1039/d4ya00010b), 2024-01-01
Supplement: d4ya00010b1.pdf [file d4ya00010b1.pdf]

## Exploring zinc oxide morphologies for aqueous solar cells by a photoelectrochemical, computational, and multivariate approach

Elisa Maruccia,<sup>a</sup> Simone Galliano,<sup>b</sup> Eduardo Schiavo,<sup>c</sup> Nadia Garino,<sup>a</sup> Ana Y. Segura Zarate,<sup>b,d</sup> Ana B. Muñoz-García,<sup>e</sup> Michele Pavone,<sup>c</sup> Claudio Gerbaldi,<sup>a</sup> Claudia Barolo,<sup>b,f,g</sup> Valentina Cauda,<sup>a</sup> Federico Bella<sup>a,\*</sup>

<sup>a</sup> Department of Applied Science and Technology, Politecnico di Torino, Corso Duca degli Abruzzi 24, 10129 – Torino, Italy

<sup>b</sup> Department of Chemistry, NIS Interdepartmental Centre and INSTM Reference Centre, Università degli Studi di Torino, Via Pietro Giuria 7, 10125 – Torino, Italy

<sup>c</sup> Department of Chemical Sciences, Università di Napoli Federico II, Comp. Univ. Monte Sant'Angelo, Via Cintia 21, 80126 – Napoli, Italy

<sup>d</sup> Escuela de Física, Instituto Tecnológico de Costa Rica, TEC, 159-7050 – Cartago, Costa Rica

<sup>e</sup> Department of Physics “Ettore Pancini”, Università di Napoli Federico II, Comp. Univ. Monte Sant'Angelo, Via Cintia 21, 80126 – Napoli, Italy

<sup>f</sup> ICxT Interdepartmental Centre, Università degli Studi di Torino, Via Lungo Dora Siena 100, 10153 – Torino, Italy

<sup>g</sup> Istituto di Scienza, Tecnologia e Sostenibilità per lo Sviluppo dei Materiali Ceramici (ISSMC-CNR), Via Granarolo 64, 48018 – Faenza, Italy

Corresponding author: [federico.bella@polito.it](mailto:federico.bella@polito.it)

### SUPPORTING INFORMATION

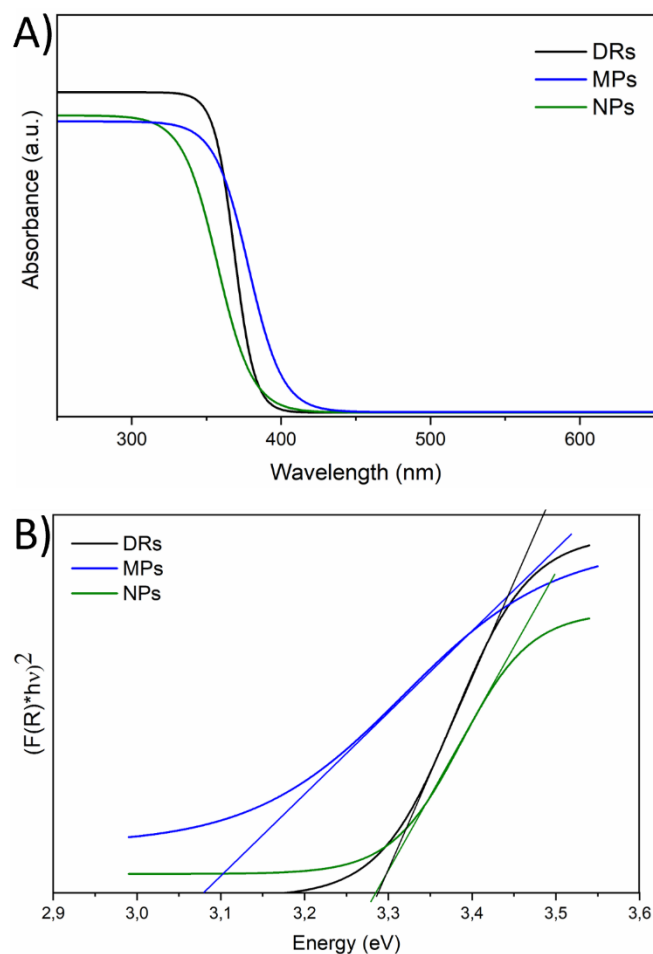

**Figure S1.** (A) UV-vis curves and (B) band-gap values for the three ZnO morphologies investigated in this work. Samples have been measured as powders dispersed in water and in absorbance mode. As expected, all the ZnO particles absorb light in the UV range from 200 to 400 nm (panel A). Their optical band gap ( $E_g$ ) was determined adopting the Tauc's method (panel B) calculated from the absorption spectra. As also previously reported [1,2], the  $E_g$  of the ZnO samples is in the range of 3.1 - 3.3 eV, confirming that all ZnO structures have a broad band gap and a semiconductor behaviour, allowing their photoexcitation by light with energies in the sole UV range.

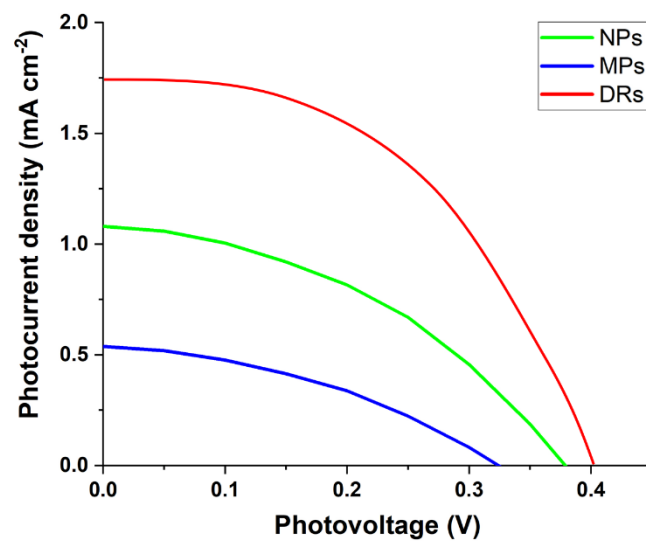

**Figure S2.** J-V curve measured under 1 sun irradiation (AM1.5G) for aqueous DSSC prepared with different ZnO morphologies, with reference to data shown in Table S1.

## References

---

[1] Hernández, S., Cauda, V., Chiodoni, A., Dallorto, S., Sacco, A., Hidalgo, D., Celasco, E., Pirri, C.F. Optimization of 1D ZnO@TiO<sub>2</sub> core-shell nanostructures for enhanced photoelectrochemical water splitting under solar light illumination. (2014) ACS Applied Materials and Interfaces, 6 (15), pp. 12153-12167.

[2] Hernández, S., Cauda, V., Hidalgo, D., Farías Rivera, V., Manfredi, D., Chiodoni, A., Pirri, F.C. Fast and low-cost synthesis of 1D ZnO-TiO<sub>2</sub>/inf core-shell nanoarrays: Characterization and enhanced photo-electrochemical performance for water splitting. (2014) Journal of Alloys and Compounds, 615 (S1), pp. S530-S537.
